# Supplementary material for: Atrial Fibrillation and Dementia: Epidemiological Insights on an Undervalued Association
Source: MDPI journal article supplement (doi:10.3390/medicina58030361), 2022-03-01

# Atrial fibrillation and dementia: epidemiological insights on an undervalued association

## *Supplementary Material*

**Figure S1** Global historical trends (1990–2019) for the age-standardized estimates of the evaluated epidemiological metrics: panel (a), incidence rate; panel (b), prevalence rate; panel (c), mortality rate; panel (d), DALYs lost due to the disease.

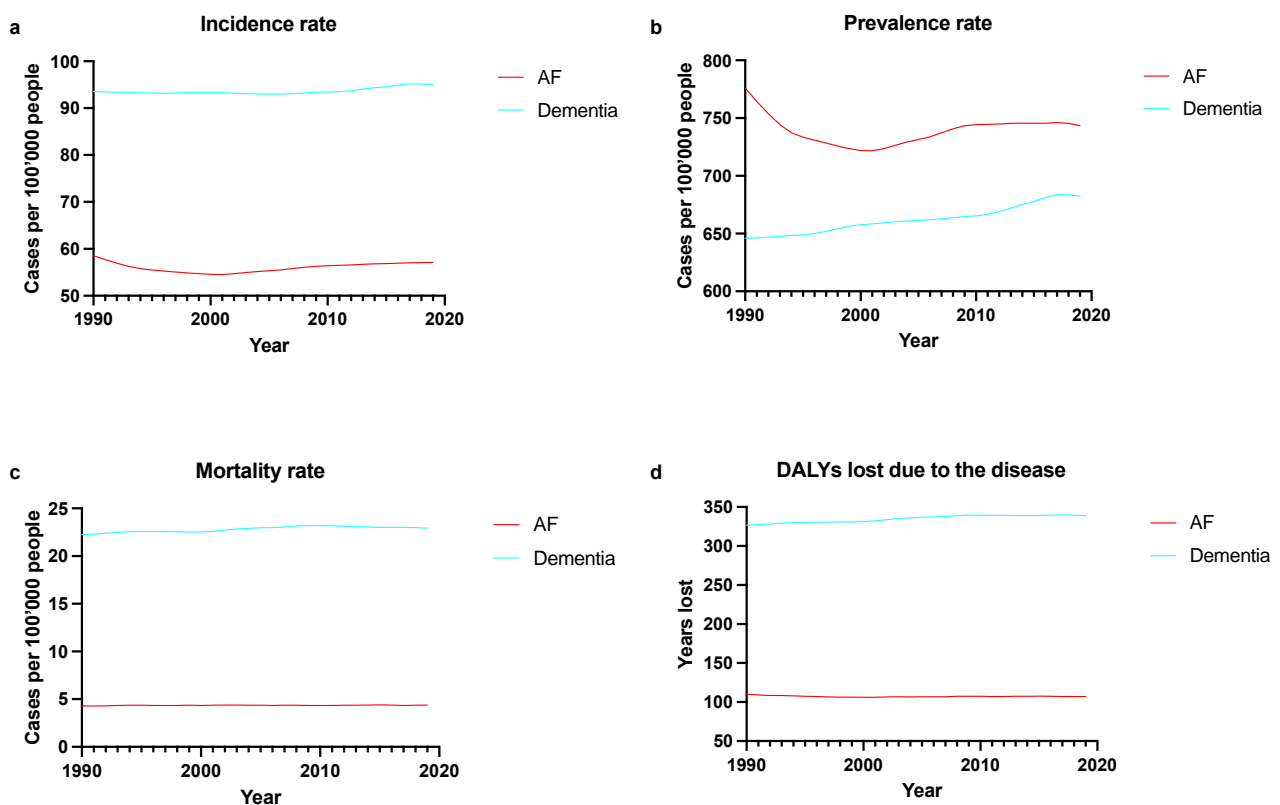

Supplement: s1 [file s1]
